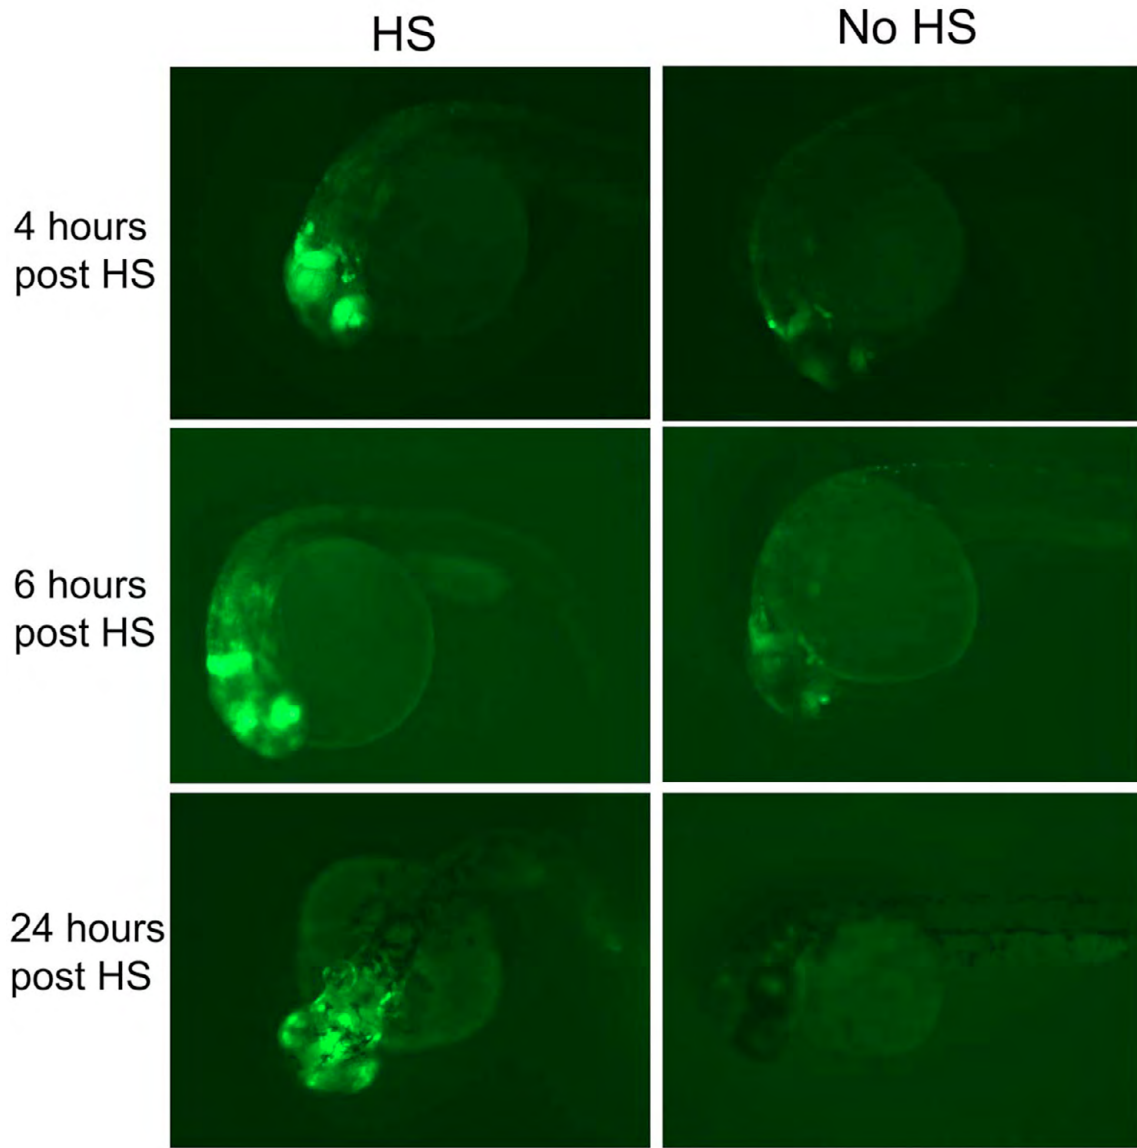

**Fig. S1. *dusp6* activation in *Tg(hsp70-HRAS<sup>G12v</sup>; dusp6-d2EGFP)* embryos with and without heat shock at different time points.** Transgenic embryos were kept at 28.5°C until 22 hpf. Some received 37°C heat shock for 1 hour; some were kept as controls. At 4, 6 and 24 hours post-heat shock, EGFP expression was observed under a fluorescence microscope. Representative images for each time point for heat shocked and control are shown.

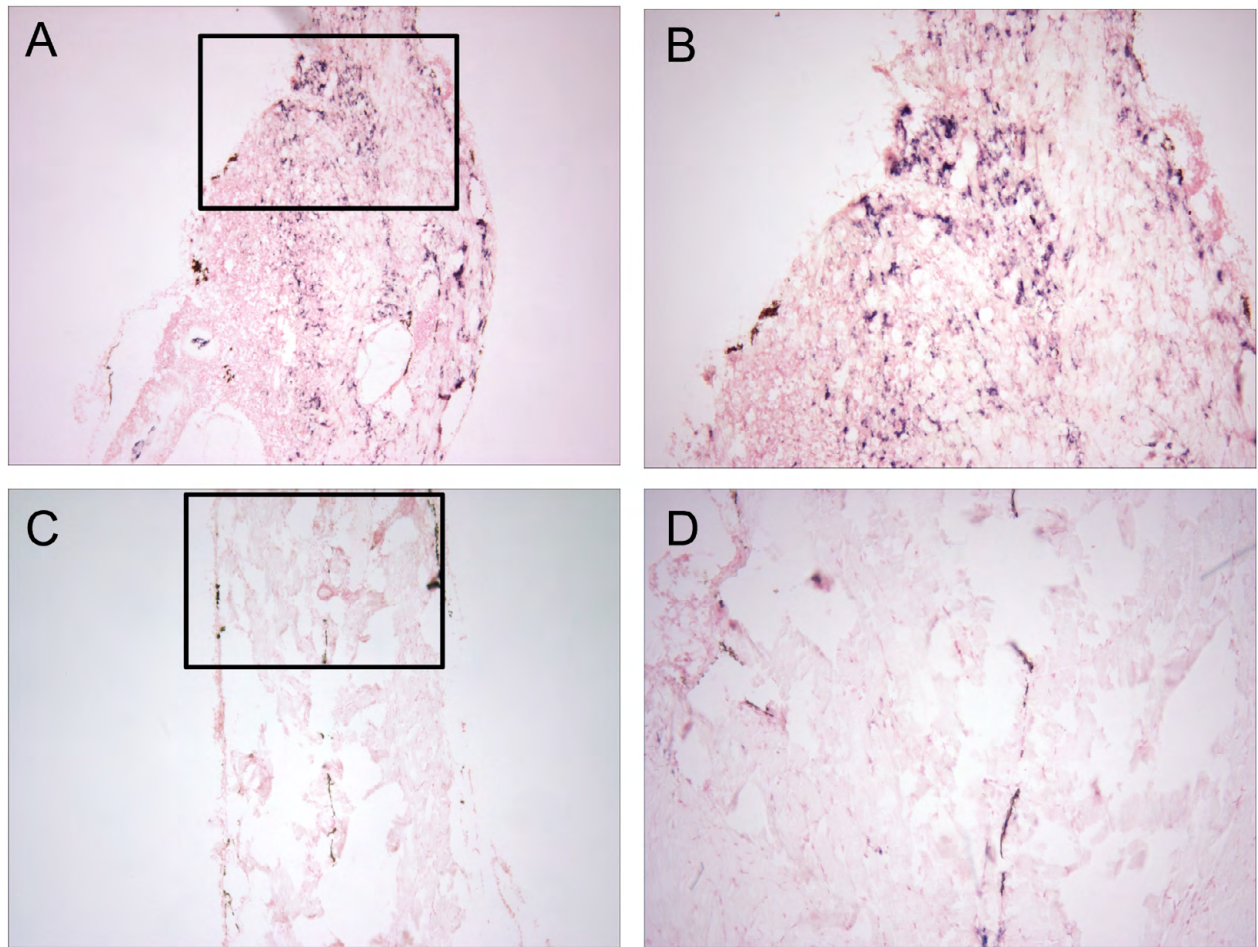

**Fig. S2. *dusp6* expression is upregulated in zebrafish rhabdomyosarcoma.** *dusp6* expression was assessed by ISH. (A,B) Sections of zebrafish ERMS. Wild-type zebrafish embryos were injected with *rag2-KRAS<sup>G12D</sup>* at the one-cell stage to induce rhabdomyosarcoma. (C,D) Sections of normal musculature. Wild-type siblings without injection as controls. (A,C) 10×, (B,D) 40×.

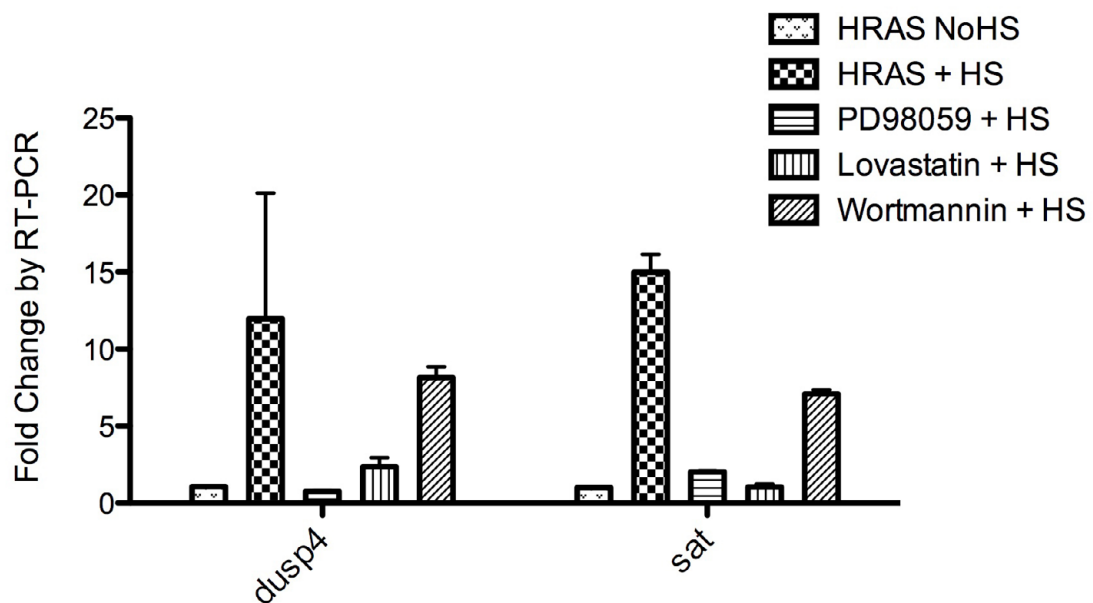

**Fig. S3. Quantitative RT-PCR analysis of *dusp4* and *sat* expression levels in response to pathway-specific chemical inhibitors.** *Tg(hsp70-HRAS<sup>G12V</sup>)* embryos were incubated with chemicals from 22-24 hpf, heat shocked for 1 hour, and analyzed at 30 hpf for expression.

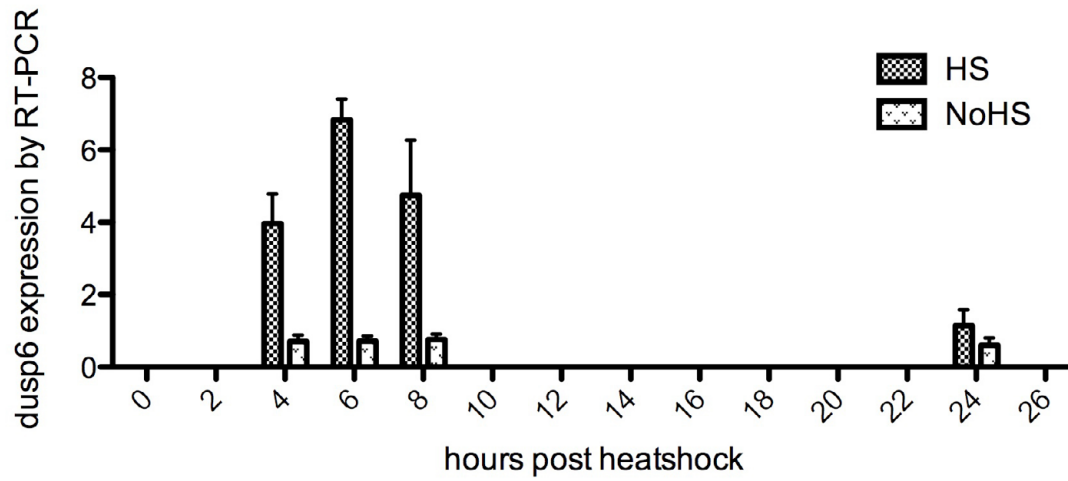

**Fig. S4. Quantitative RT-PCR analysis of *dusp6* activation levels in *Tg(hsp70-HRAS<sup>G12V</sup>)* at various time points after 1 hour of heat shock.** Transgenic embryos were kept at 28.5°C until 22 hpf. Some received 37°C heat shock for 1 hour; some were kept as controls. At 4, 6, 8 and 24 hours post-heat shock, the embryos were harvested for RNA extraction and RT-PCR analysis. Transgenic embryos kept at 28.5°C without heat shock were used as controls.

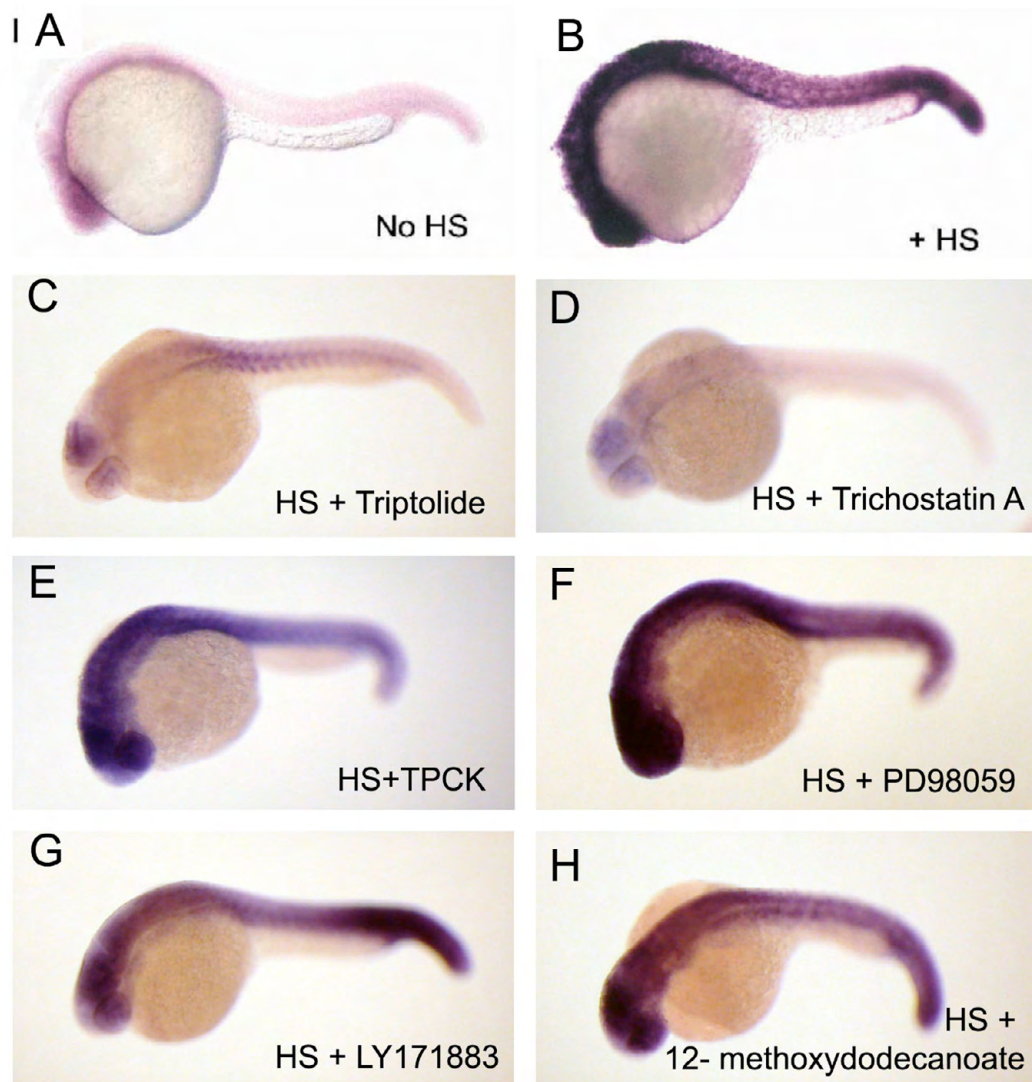

**Fig. S5. *In situ* hybridization of *Cre* in transgenic *Tg(hsp70-Cre)* embryos with chemical treatment.** (A,B) *Tg(hsp70-Cre)* embryos with or without heat shock were fixed and subjected to ISH for *Cre* as controls. (C,D) *Tg(hsp70-Cre)* embryos were incubated in chemicals (Triptolide and TSA) from 22 hpf, heat shocked from 24-25 hpf, fixed at 30 hpf, and analyzed by ISH for *Cre*. The *Cre* expression levels were suppressed in comparison to B, indicating that these chemicals interfere with heat shock promoter activation or transcription. (E-H) *Tg(hsp70-Cre)* embryos were incubated in chemicals (TPCK, PD98059, LY171883 and 12-methoxydodecanoate) from 22 hpf, heat shocked from 24-25 hpf, fixed at 30 hpf, and analyzed by ISH for *Cre*. The *Cre* expression levels were not suppressed in comparison to B, indicating that these chemicals do not interfere with heat shock promoter activation or transcription; therefore, these chemicals were confirmed as suppressors of the RAS pathway.

**A**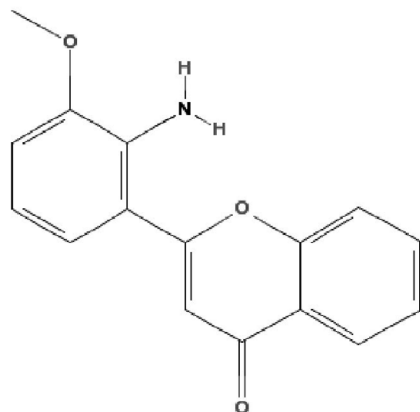**B**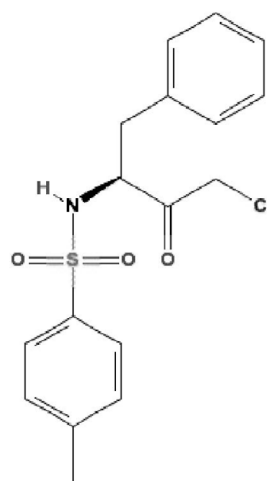

**Fig. S6. Chemical structures of PD98059 and TPCK.** (A) PD98059 and (B) TPCK. Modified from PubChem (<http://pubchem.ncbi.nlm.nih.gov/>).



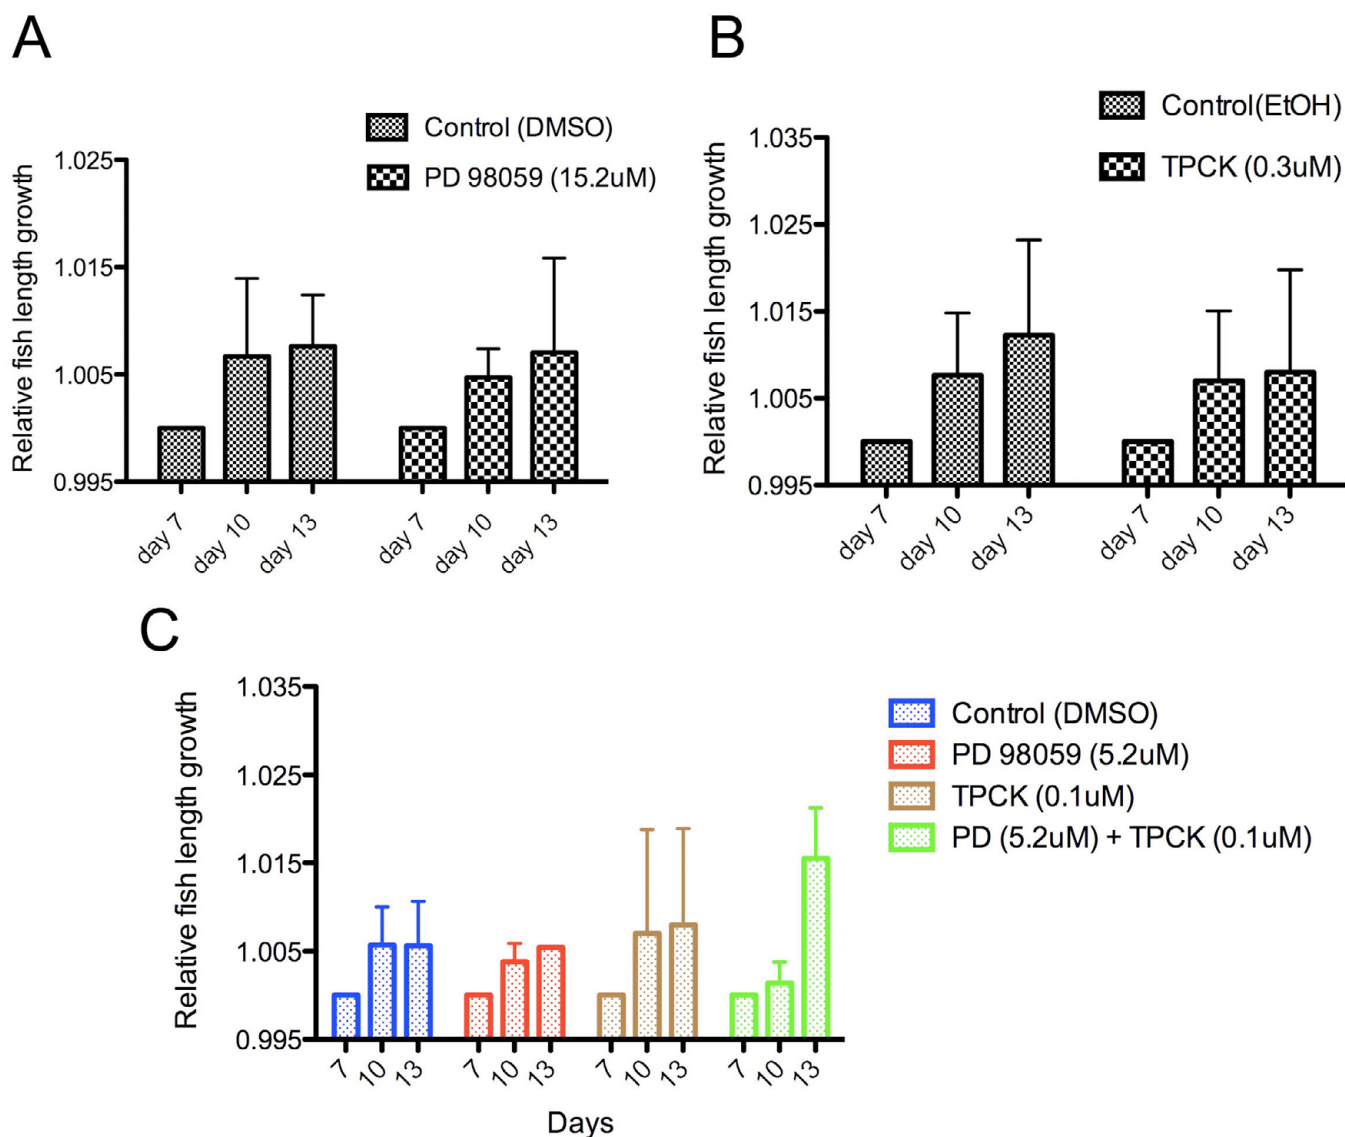

**Fig. S7. Overall fish growth was not altered by chemical treatment in tumor-bearing fish.** (A) Relative growth of fish (total length) was compared between the PD98059-treated group ( $1.005 \pm 0.0097$ ,  $n=13$  at day 10;  $1.007 \pm 0.025$ ,  $n=8$  at day 13) and vehicle (DMSO)-treated group ( $1.0067 \pm 0.023$ ,  $n=10$  at day 10;  $1.0077 \pm 0.015$ ,  $n=10$  at day 13).  $P > 0.90$ , ANOVA. (B) Relative increase in total fish length was compared between the TPCK-treated group ( $1.007 \pm 0.031$ ,  $n=15$  at day 10;  $1.008 \pm 0.029$ ,  $n=6$  at day 13) and vehicle (EtOH)-treated group ( $1.008 \pm 0.020$ ,  $n=8$  at day 10;  $1.012 \pm 0.015$ ,  $n=2$  at day 13).  $P > 0.90$ , ANOVA. (C) Relative increase in total fish length was compared in four groups: PD98059-treated group ( $1.004 \pm 0.0075$ ,  $n=13$  at day 10;  $1.0054$ ,  $n=1$  at day 13), TPCK-treated group ( $1.007 \pm 0.031$ ,  $n=7$  at day 10;  $1.008 \pm 0.029$ ,  $n=7$  at day 13), combination-treated group ( $1.0014 \pm 0.012$ ,  $n=27$  at day 10;  $1.015 \pm 0.017$ ,  $n=9$  at day 13) and vehicle (DMSO)-treated group ( $1.006 \pm 0.015$ ,  $n=12$  at day 10;  $1.006 \pm 0.015$ ,  $n=9$  at day 13).  $P > 0.85$ , ANOVA.

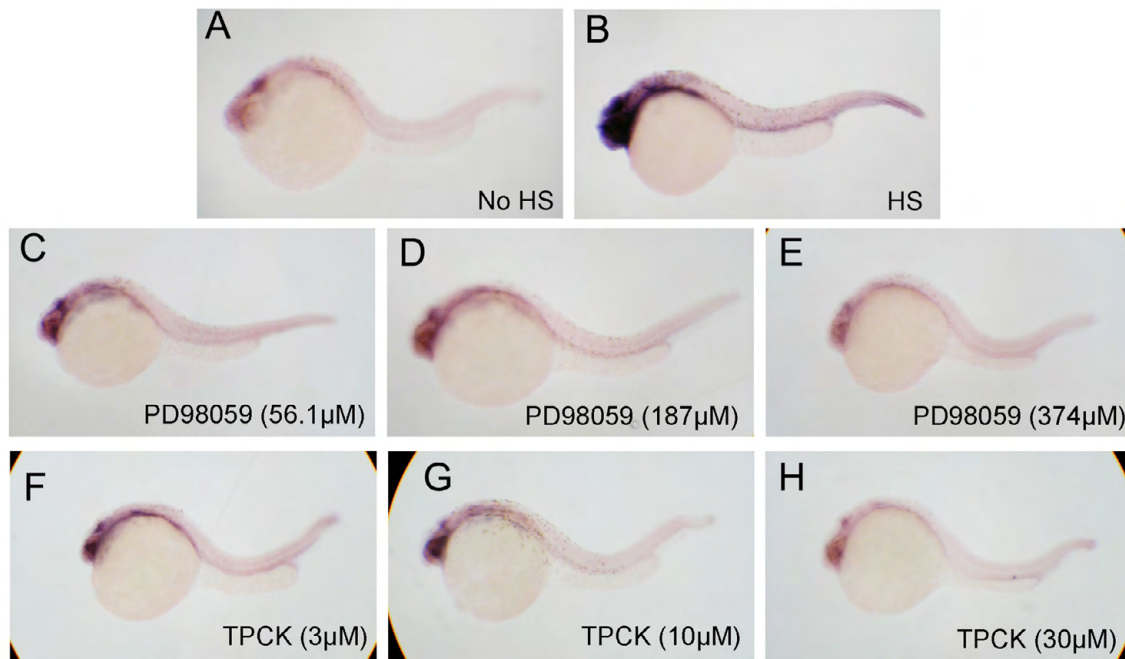

**Fig. S8. PD98059 and TPCK suppress *dusp6* upregulation in *Tg(hsp70-HRAS<sup>G12V</sup>)* embryos in a dose-dependent manner.** *dusp6* expression was assessed by ISH. (A,B) *Tg(hsp70-HRAS<sup>G12V</sup>)* receiving heat shock or no heat shock treatment provided positive and negative controls. (C-E) *Tg(hsp70-HRAS<sup>G12V</sup>)* receiving PD98059 treatment in an increasing dose demonstrated a decreasing expression level of *dusp6*. (F-H) *Tg(hsp70-HRAS<sup>G12V</sup>)* receiving TPCK treatment in an increasing dose demonstrated a decreasing expression level of *dusp6*.

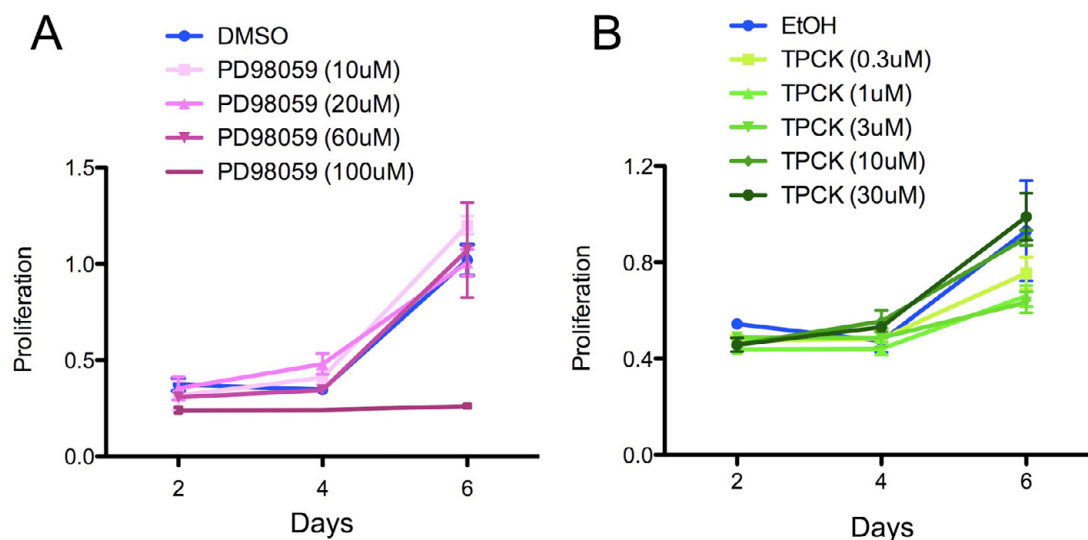

**Fig. S9. PD98059 and TPCK did not suppress cell proliferation in mouse embryonic fibroblasts.** Cells were plated in 96-well tissue culture plates at day -1. Cells were treated with a range of concentrations of (A) PD98059 (10-100 μM) or (B) TPCK (0.3-30 μM) starting at day 0 and continuing throughout the 6-day treatment. Medium/chemicals were changed on days 0, 2 and 4 to ensure continued chemical activity and adequate nutrients for cell growth. Cell proliferation was measured by MTT assay at days 2, 4 and 6. y-axis represents absolute OD from the MTT assay.

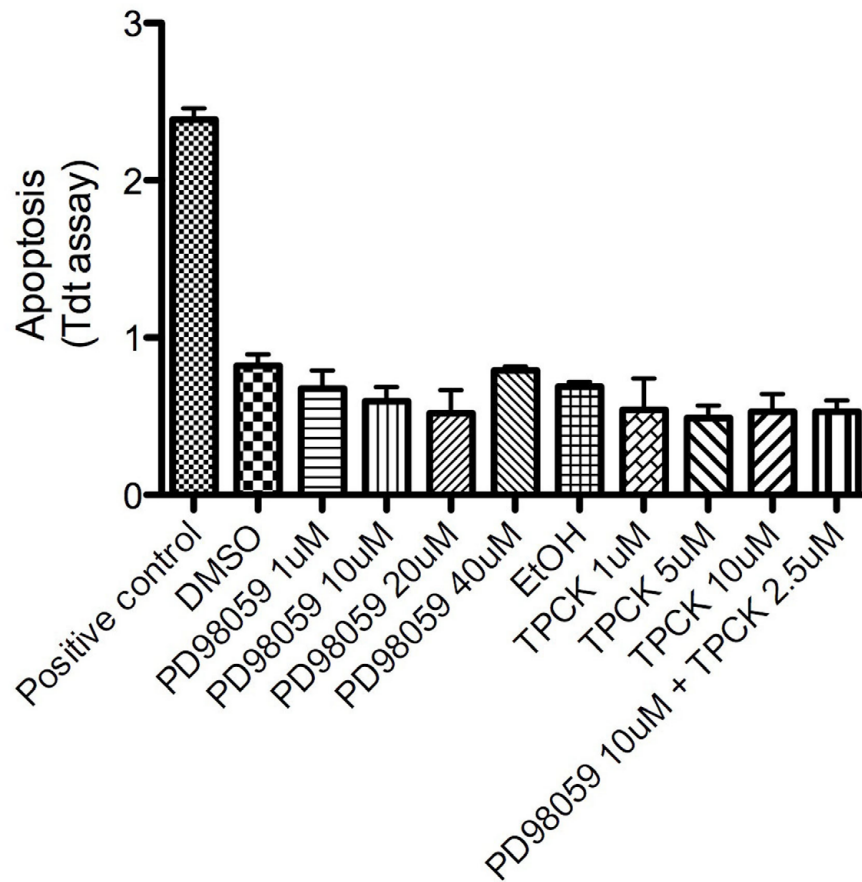

**Fig. S10. Apoptosis levels, measured by TdT assay, were not altered by chemical treatments in RD cells.** In comparison to vehicle controls (DMSO or EtOH), PD98059 (10-40  $\mu$ M) treatment or TPCK (1-10  $\mu$ M) or a combination (10  $\mu$ M PD98059 + 2.5  $\mu$ M TPCK) demonstrated similar apoptosis levels after 4 days of continued chemical exposure.

**Table S1. Primers for RT-PCR of 17 genes tested in *Tg(hsp70-HRAS<sup>G12V</sup>)* and wild-type zebrafish**

embryos

| Gene           | Forward primer (5'-3') | Reverse primer (5'-3')  |
|----------------|------------------------|-------------------------|
| <i>ctsl</i>    | GATGCAGGACATGAATCCTT   | TAGCCATGTAAATGTAGCCT    |
| <i>ddx18</i>   | CAGCCATGGCGGACATGCAGA  | CCGGTCCTCAAACGCACCTGT   |
| <i>mcl1</i>    | AATGTGTCCGGTAGACCGTA   | TACATCTGATGAAGTCCAGA    |
| <i>csflr</i>   | ATGGATATCCAGCTCCCAGCA  | TCTGGATCGGCTGCTGCAGATCT |
| <i>dusp4</i>   | AGCTCCGATACAAACACCAT   | TACTGGACTGAGAACTGGACA   |
| <i>dusp6</i>   | TACTGCTGAGGAGAATGAA    | ACTGCTGCTTGACGAACCGT    |
| <i>gbp1</i>    | GAGTGCACTCACCTGAGGT    | GCACCTCAGGCTCTACACAT    |
| <i>arpc1</i>   | AACTGGTTCATTCTCAGGATCA | TAAAGTCGCACGATCCAGCT    |
| <i>calr</i>    | TGGCACTGGCAGCCAATGCA   | TAACCGTAAACTGGATCACCA   |
| <i>fgfr3</i>   | TGGCATCAAGCTACGACATCA  | AGGCTGAGCATCACTGTACA    |
| <i>msn</i>     | ACCATCGAGGTCCAGCAGAT   | TCCTGAGCACGTTTACGCT     |
| <i>pdia3</i>   | TCGCACCCTGGTGTGGTCACT  | CGGCACTTCCTCCGTGACGG    |
| <i>psmb2</i>   | ATCCAGATGAAGCACGATTA   | ACATGATATGGAGTCCGACT    |
| <i>sat</i>     | ATCAGTCCATCGAAGGTTATA  | TGAAGTGCATACCGCTGCAT    |
| <i>snrpd3</i>  | AGTAAGATCAGGTTCTCATC   | TGGTCCACCACGACCACGT     |
| <i>ssb</i>     | AGCTGCAGTTAGACGACGGA   | ATTCCTCGTTGTTCTCAGGA    |
| <i>lrrfip1</i> | TGGATGCAACTGGTGCTTAC   | GTCCAGCTGTGCATTGGACA    |



**Table S2. Upregulated gene list**

[Download Table S2](#)

**Table S3. Downregulated gene list**

[Download Table S3](#)

**Table S4. Eighteen compounds confirmed as RAS signaling pathway inhibitors**

PD98059  
TPCK  
XK469  
Lovastatin  
Dipyron  
Tyrphostin AG 126  
Lisofylline  
CinnGEL  
SB 431542  
Clofibrate  
LY 171883  
Bithionol  
Benzyl isothiocyanate (BITC)  
Catechin  
Epigallocatechin  
Hesperetin  
Mycophenolic acid  
12-methoxydodecanoate
